## RESEARCH ARTICLE

# Multielectrode array characterization of human induced pluripotent stem cell derived neurons in co-culture with primary human astrocytes

Maddie R. Lemieux<sup>1\*</sup>, Bernhard Freigassner<sup>1</sup>, Jessica L. Hanson<sup>1,2</sup>, Zahra Thathey<sup>1</sup>, Mark R. Opp<sup>1</sup>, Charles A. Hoeffer<sup>1,2</sup>, Christopher D. Link<sup>1\*</sup>

**1** Department of Integrative Physiology, University of Colorado Boulder, Boulder, Colorado, United States of America, **2** Institute for Behavioral Genetics, University of Colorado Boulder, Boulder, Colorado, United States of America

\* [madeline.lemieux@colorado.edu](mailto:madeline.lemieux@colorado.edu) (MRL); [linkc@colorado.edu](mailto:linkc@colorado.edu) (CDL)

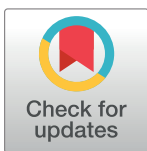

## OPEN ACCESS

**Citation:** Lemieux MR, Freigassner B, Hanson JL, Thathey Z, Opp MR, Hoeffer CA, et al. (2024) Multielectrode array characterization of human induced pluripotent stem cell derived neurons in co-culture with primary human astrocytes. PLoS ONE 19(6): e0303901. <https://doi.org/10.1371/journal.pone.0303901>

**Editor:** Gerrit Hilgen, Northumbria University, UNITED KINGDOM

**Received:** January 23, 2024

**Accepted:** May 2, 2024

**Published:** June 25, 2024

**Copyright:** © 2024 Lemieux et al. This is an open access article distributed under the terms of the [Creative Commons Attribution License](https://creativecommons.org/licenses/by/4.0/), which permits unrestricted use, distribution, and reproduction in any medium, provided the original author and source are credited.

**Data Availability Statement:** All relevant data are within the manuscript and [supplementary information](#).

**Funding:** This project was funded by the National Institute on Aging of the National Institutes of Health award RF1AG064465 to MRO, CH, and CDL. In addition, funding was provided by the National Institute of Mental Health training grant T32 MH016880 to JLH. The funders had no role in

## Abstract

Human induced pluripotent stem cells (hiPSCs) derived into neurons offer a powerful *in vitro* model to study cellular processes. One method to characterize functional network properties of these cells is using multielectrode arrays (MEAs). MEAs can measure the electrophysiological activity of cellular cultures for extended periods of time without disruption. Here we used WTC11 hiPSCs with a doxycycline-inducible neurogenin 2 (NGN2) transgene differentiated into neurons co-cultured with primary human astrocytes. We achieved a synchrony index  $\sim 0.9$  in as little as six-weeks with a mean firing rate of  $\sim 13$  Hz. Previous reports show that derived 3D brain organoids can take several months to achieve similar strong network burst synchrony. We also used this co-culture to model aspects of blood-brain barrier breakdown by using human serum. Our fully human co-culture achieved strong network burst synchrony in a fraction of the time of previous reports, making it an excellent first pass, high-throughput method for studying network properties and neurodegenerative diseases.

## Introduction

The brain can respond to different stimuli in numerous ways depending on cell specialization and connectivity of neuronal circuits [1]. Studying these response patterns is important for understanding normal brain function and neurodegenerative disease states. Multielectrode arrays (MEAs) are a powerful tool that can be used to measure network electrophysiological changes. A common use of MEAs is to measure ex-vivo brain slice plasticity. However, a less exploited benefit of this system is the ability to characterize *in vitro* neuronal networks without cellular disruption [2, 3]. When using MEAs one can record extracellular action potentials and local field potentials of populations of neurons for long periods of time [4]. These readouts can advance the neuroscience field due to their sensitivity and ability to mimic aspects of clinical data [5].

study design, data collection and analysis, decision to publish, or preparation of the manuscript.

**Competing interests:** The authors have declared that no competing interests exist.

One MEA approach is to use human neurons derived from induced pluripotent stem cells (iPSCs). This model has advantages compared to using rodent cells as it provides phenotypic relevance to human brain neural networks and eliminates the species gap [6]. Human neuronal cultures begin with asynchronous, sporadic spiking due to lack of network interconnectivity [3]. The firing of one neuron may occur as a single spike or in clusters called bursts. Bursts are described as a period of intense spiking activity followed by a period of quiescence, and a network burst is the coordination of these spiking patterns across multiple cells [7]. As the culture develops, a synchronous network forms, suggesting the integration of individual neurons into an organized circuit [4]. Some critical parameters measured by multielectrode arrays include mean firing rate, network burst frequency, synchrony, and the coefficient of variation for the network interburst interval (IBI). The synchronization of cultures refers to the coordinated or simultaneous spiking between cells, and the coefficient of variation for the network IBI is a measure of network burst regularity. To achieve this strong, synchronous network bursting pattern, iPSCs derived from two-dimensional neuron monocultures need to be cultured with supporting cells such as astrocytes [3, 8].

One major limiting factor of human based *in vitro* MEA studies is the time it takes to achieve network synchrony. Rodent cell models acquire this property within a few weeks while human cultures can take several months [3, 9]. Specifically, it has been found that human organoids take more than 30 weeks to reach a mean firing rate above 10 Hz and a synchrony index of 0.8 [10]. Two-dimensional cultures using human iPSC neurogenin 2 (NGN2) inducible neurons only achieved this firing rate when cultured with rodent astrocytes and not with human iPSC-derived astrocytes [11, 12].

MEAs have also been used to model neurodegenerative disease states. Modeling sporadic Alzheimer's disease (AD) is of significant relevance as it is the most common form of neurodegenerative disease [13]. Most *in vivo* animal approaches, however, use transgenic rodents, which only capture the genetic aspect of onset as amyloid beta plaques or tau tangles do not spontaneously form in aged rodents [13]. Recently, an *in vitro* method has been established by Chen et al. [14]. They treated human organoids with 10% human serum to replicate the breakdown of the blood-brain barrier seen in Alzheimer's disease patients. After treatment, they observed AD-like pathologies, including increased amyloid beta aggregates and phosphorylated microtubule-associated tau protein levels. They also noted synaptic loss and impaired neural networks observed by MEA analysis, including reduced mean firing, synchrony, and bursts. In addition, single-cell transcriptomic analysis revealed immune activation of astrocytes after relatively chronic exposure [14]. This model provides a basis for future pharmacological interventions to be tested in a high throughput manner. However, as discussed previously, a limiting factor of this human organoid *in vitro* system is the amount of time it takes to achieve maturity of the culture.

Here, we present results of studies using fully humanized *in vitro* neuronal networks cultured on multielectrode arrays that were able to reproducibly achieve strong network burst synchrony in as little as six weeks. We used WTC11 human iPSCs containing a doxycycline-inducible neurogenin 2 (NGN2) transgene derived into neurons co-cultured with primary human astrocytes. The WTC11 cell line is particularly well characterized and is the cell line used for reporter iPSCs by the Allen Institute [15]. The NGN2-inducible derivative of this line can be quickly and reproducibly induced to make a population of largely excitatory neurons [16], which, for example, have been used both to model neurodegenerative disease [17] and as the basis for CRISPR-based screens [18]. In addition, we explored electrophysiological changes potentially associated with sporadic Alzheimer's disease by treating our cultures with 10% human serum. Overall, we have established a fully human *in vitro* model that can be used to investigate neuronal network function in a high throughput manner.

## Materials and methods

### Maintenance and expansion of hiPSCs

WTC11 human induced pluripotent stem cells (iPSCs) containing a doxycycline inducible NGN2 transgene were cultured on 6-well Matrigel-coated plates as previously described by Fernandopulle et al. [16]. mTeSR plus media was changed daily or every other day until cells reached near 90% confluency. Cells were washed with PBS and split with 0.5 mM EDTA (room temperature for 5–7 minutes) for expansion or accutase (37°C for 4 minutes) for single-cell differentiation.

### Generation of hiPSC derived neurons

hiPSCs were single cell split with accutase and plated on 10 cm Matrigel coated plates. The induction media consisted of DMEM/F12 with HEPES, N2 (1X, Gibco), NEAA (1X, Gibco), Glutamax (1X, Gibco), doxycycline (2 µg/mL), and ROCK inhibitor Y-27632 (10 µM). Media was changed daily for 3 days with only the initial plating media containing ROCK inhibitor. Cells were then detached with accutase, spun down at 250 x g for 5 minutes, resuspended, and either frozen or re-plated to complete maturation. Cortical maturation media contained Brain-Phys neuronal medium (STEMCELL Technologies), B27 (1X, Gibco), BDNF (10 ng/mL, PeproTech), NT-3 (10 ng/mL, PeproTech), laminin (1 µg/mL, Gibco), and doxycycline (2 µg/mL). Maturation was either completed on 8-well Permanox treated chamber slides or directly on multielectrode arrays. The minimum time for cells to reach maturity was 14 days.

### Astrocyte culturing

Fetal human astrocytes (Lonza) were cultured in Astrocyte Media (ScienCell) on 6-well plates until 80–90% confluent. PBS was used to wash the cells before collection. Cells were detached using TrypLE express (Gibco) at 37°C for 3–5 minutes. Following incubation, astrocyte media was added to stop the reaction. The cells were collected and centrifuged at 200–300 x g for 5 minutes. Fresh astrocyte media was used to resuspend the cell pellet.

### Co-culture on multielectrode arrays

Multielectrode array 24-well plates containing 16 electrodes per well were obtained from Axion Biosystems (CytoView MEA plates and BioCircuit MEA plates). The electrodes were arranged in a 4x4 grid 350 µm apart, with each electrode diameter being 50 µm. The electrode recording area was 1.1 mm x 1.1 mm. Plates were sterile upon arrival and prepared for cell adhesion by treating the field of electrodes with 100 µL of 0.1 mg/mL Poly-D-Lysine at 37°C for 4.5 hours. The wells were washed with water three times and dried in a biosafety cabinet overnight. 20 µg/mL laminin droplets (20 µL) were added to each electrode array and incubated at 37°C for at least one hour. A master mix of day 3 neural progenitor cells and astrocytes was made (90,000 NPCs: 45,000 astrocytes per well) and plated in 12 µL drops on each electrode field. The cell culture droplets were incubated at 37°C for one hour, followed by adding 1 mL cortical media to fill the well. Water was added to the surrounding within-plate reservoirs to prevent media evaporation. Media changes occurred every 2–4 days by performing half media changes. Cells matured for about one month.

### Electrophysiology recordings

Spontaneous extracellular activity was acquired using Axion Biosystem Maestro Edge MEA. This system utilizes 24 well plates, each with 16 electrodes to measure neuronal firing. Cultures were maintained in a cell culture incubator and then the 24 well plate was transferred to the

Axion instrument for assays. When in the instrument, cells were kept at 37°C with 5% CO<sub>2</sub> for the duration of the recordings. The Axion default sampling rate was 12.5 kHz/channel, and the signal was passed through the spontaneous filter (200 Hz–3 kHz). Recordings were taken for 6-minute durations. Analysis was done using the Axis plotting tool and neural metrics tool. Unless otherwise specified, the spike threshold was set to > 6 standard deviations above noise levels with active electrodes having at least 5 spikes/min for spontaneous recordings. Single electrode bursts had a minimum of 5 spikes with a max interspike interval of 100 milliseconds (ms). Network burst parameters were set to a minimum of 50 spikes per network burst with a max interspike interval of 10 ms. This interspike interval was chosen as it maximized spike calls and minimized artifactual ones. At least 35% of electrodes were coordinated to be considered a well with network bursts.

### Immunofluorescent staining

Cultures were grown in 8-well Permax chamber slides and fixed at various time points between 14–33 days. Media was removed, and cells were fixed with 4% paraformaldehyde for 10 minutes. After fixation, cells were permeabilized with 0.1% Triton-X100 PBS solution for 5 minutes. The cultures were blocked with 5% bovine serum albumin (BSA) for 30 minutes, and primaries were then added and kept overnight at 4°C. Secondary antibodies were added for 1 h at room temperature followed by DAPI (1 µg/mL) staining. Primary antibodies used were MAP2 (1:200, Millipore), β3-Tubulin (1:200, Cell Signaling Technology), and GFAP (1:500, Novus Biologics). Secondaries used were Alexa fluor 555 and 488, Invitrogen at 1: 500 or 1:1000 dilutions. Imaging was performed with Nikon A1R Laser Scanning Confocal using a 20 x Air objective with 0.75NA maintained by the BioFrontiers Advanced Light Microscopy Core.

### Statistical analysis

Data was collected and analyzed via the Axis plotting tool and neural metrics tool provided in the Axion Biosystem Maestro Edge software package. Statistical analyses were performed from the exported data files. Most data were analyzed using repeated measures ANOVA with an alpha value of 0.05 followed by Bonferroni corrections. Two-plate comparisons were made using independent t-tests with an alpha value of 0.05.

### Ethics statement

The studies described here employed a commonly used, anonymous iPSC line and were approved by the University of Colorado Institutional Biosafety Committee, application # BA19-IPHY-LIN-01.

## Results

### Generation and characterization of human neuronal cultures

WTC11 human induced pluripotent stem cells (hiPSCs) containing a neurogenin 2 (NGN2) transgene were differentiated into neural progenitor cells (NPCs) using a 3-day, 2 µg/mL doxycycline induction as previously described [16]. Pre-differentiated NPCs were further matured into neurons using cortical maturation media (CM) for a minimum of 14 days. Cells were fixed and characterized with mature neuronal marker MAP2 (Fig 1). In order to achieve optimal electrophysiological performance, NPCs were co-cultured with primary human astrocytes during maturation at a 2:1 ratio. These co-cultures were characterized with a neuronal MAP2 marker and an astrocyte marker GFAP.



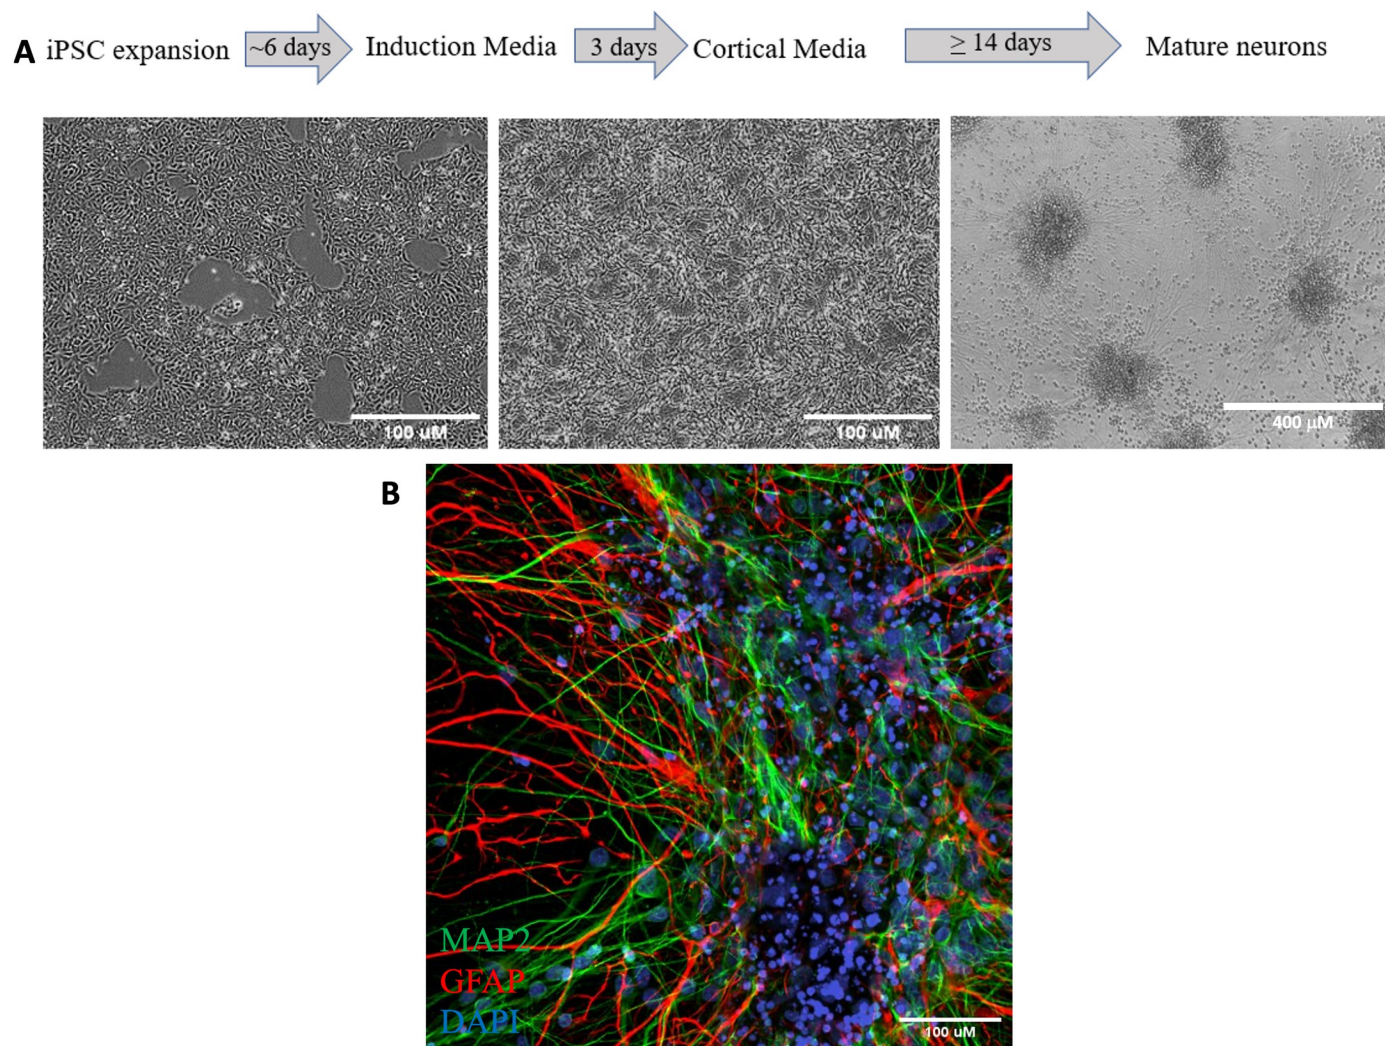

**Fig 1. Generation and characterization of hiPSC derived neuron and astrocyte co-culture.** (A) Workflow and timeline to produce mature neurons from WTC11 neurogenin 2 inducible hiPSCs (B) Co-culture stained for mature neuronal marker MAP2 (green), astrocyte marker (red) and DAPI (blue).

<https://doi.org/10.1371/journal.pone.0303901.g001>

### Co-culture electrophysiological maturation

Multielectrode arrays were used to characterize the electrophysiological properties of cellular network formation. Co-cultures containing 90,000 NPCs and 45,000 astrocytes were seeded per well on Axion Biosystem CytoView MEA 24-well plates. The cells were recorded and monitored visually for about 30 days before treatments. Recordings were taken daily starting on day 11 of maturation, and all 24-wells were averaged and quantified for specific parameters (Fig 2). Spontaneous firing was observed 11 days *in vitro* (DIV); however, there was no network activity. After 17 DIV, the mean firing rate increased more than 10-fold and almost all electrodes were active. Synchronized network bursts appeared at a frequency of 0.11 Hz, indicating the formation of a cellular network. The network interburst interval coefficient of variation was 0.44, and the synchrony index was 0.58 17 DIV. From this initiation of network activity, the co-culture continued to mature and stabilize until 33 DIV. This maturation is summarized in Fig 2. The mean firing rate 26 DIV was 17.4 Hz with a network burst frequency of 0.16 Hz. The synchrony index was 0.82, and the network IBI coefficient of variation was

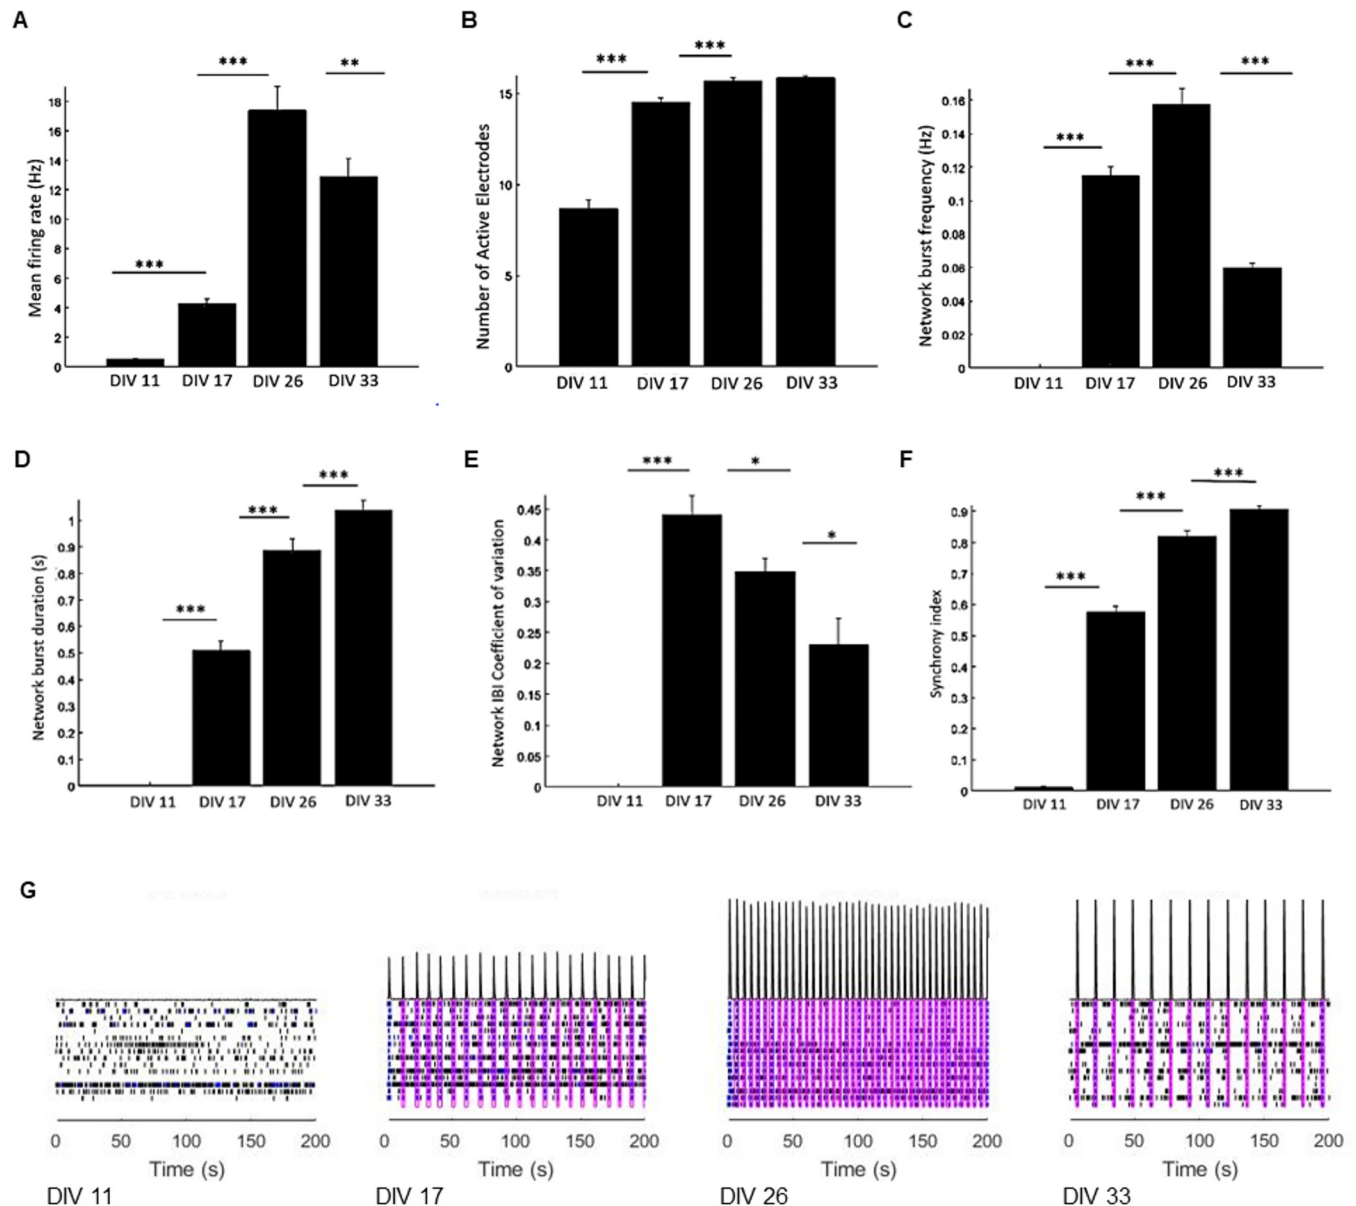

**Fig 2. Co-culture electrophysiological maturation.** 24-well quantification of (A) Mean firing rate (Hz), (B) Number of active electrodes, (C) Network burst frequency (Hz), (D) Network burst duration (s), (E) Network interburst interval coefficient of variation, and (F) Synchrony index on DIV 11, 17, 26, and 33. (G) Representative raster plots. Statistical analysis was performed with repeated measures ANOVA and Bonferroni corrections Error bar: SEM. N = 24 independent wells. p-value < 0.05 \*, p-value < 0.01 \*\*, p-value < 0.001 \*\*\*.

<https://doi.org/10.1371/journal.pone.0303901.g002>

0.35. While the mean firing rate and network burst frequency peaked at this timepoint, the synchrony index and network IBI coefficient of variation continued to improve. At 33 days *in vitro*, the cultures were considered mature [10] with an mean firing rate of 12.9 Hz and synchrony index of 0.91. The average network burst frequency was 0.06 Hz with the network burst duration reaching its peak of 1.03 seconds. In addition, the cultures were considered stable with a network IBI coefficient of variation of 0.23, indicating the regularity of network bursting.

The strong network activity appeared quickly compared to previously reported human *in vitro* experiments [11]. From hiPSCs to electrophysiological mature co-cultures, our workflow takes about 40 days. Parameters, such as the mean firing rate and synchrony index, we see at maturity are comparable to human organoids that have been in culture for 30 weeks or cultures that contain rodent cells [10–12]. This is a significant advantage for future studies, as our model is fully human and takes a fraction of the time to reach maturity. We observed very reproducible electrophysiological parameters across completely independent co-culture experiments (S1 Fig). For these experiments we plated the same 2:1 ratio of NPCs to astrocytes on two independent MEA 24-well plates. (Recordings reported from plate 2 were 32 DIV, one day less than plate 1.) Importantly, plate 2 contained NPCs from two separate differentiation passages compared to plate 1, allowing three different technical replicates of NPCs to be observed. In addition, the two plates contained astrocytes from different passage numbers. Overall, the two plates were similar with parameters such the synchrony index, mean firing rate, and number of active electrodes having no statistical difference. While the network IBI coefficient of variation for plate 1 was about 1.5-fold greater than plate 2, this difference was not statistically significant. However, the average network burst frequency and network burst duration were statistically different between the two plates. These discrepancies could be explained by slight variations in cell numbers due to the low media volumes and cell high density used for plating. Another source of variability could be innate inconsistencies in maturation time or neuronal differentiation. Nevertheless, strong cellular networks formed on both plates in about six weeks, confirming a robust differentiation and maturation protocol.

### Pharmacological validation

Upon achieving network functionality, the co-cultures were validated pharmacologically. All treatments and control wells were recorded every 2 hours for 24 hours. After which, a washout consisted of a half-media change, and cells were additionally observed and recorded following the wash. Interestingly, throughout maturation we noted electrophysiological fluctuations due to media changes. Immediately upon receiving fresh media, the mean firing rate and network burst frequency significantly increased. This change could be due to a response to replenished nutrients. It could also be due to the cells needing time to stabilize in the instrument. In order to avoid these confounding factors, we performed media changes 24 hours before treatments and gave cells a brief incubation time in the instrument before recordings.

We performed pharmacological experiments with glutamatergic receptor antagonists (Fig 3). CNQX and AP5 (10  $\mu$ M each dissolved in DMSO) were administered to block either AMPA or NMDA receptors, respectively. Control wells were subjected to 0.1% DMSO. A half-media change was also performed on control wells after the 24-hour recording to mimic the washout period in treated wells. CNQX, but not AP5, completely ablated synchronous firing at 4 hr. This result demonstrated that the synchronous firing observed in our cultures was dependent on AMPA-type glutamate receptors.

To test the cell signaling contribution of GABAergic neurons in our cultures, we administered GABA receptor inhibitors bicuculline (50  $\mu$ M) or picrotoxin (50  $\mu$ M) (Fig 4). BioCircuit MEA Plates were used for these studies, which had reduced baseline activity compared to the CytoView MEA Plates. These treatments produced no significant changes to the cultures at any timepoint, starting at 2hr. In addition, no significant changes were observed in an independent test of bicuculline (10 $\mu$ M) that included a 30-minute post-treatment timepoint (S2 Fig). In previous reports using hiPSC cortical derived neurons, 10  $\mu$ M bicuculline significantly increased the mean firing rate [9]. We did not see this, and in fact had a slight decrease in activity. This result is consistent with the inducible NGN2 protocol producing mainly



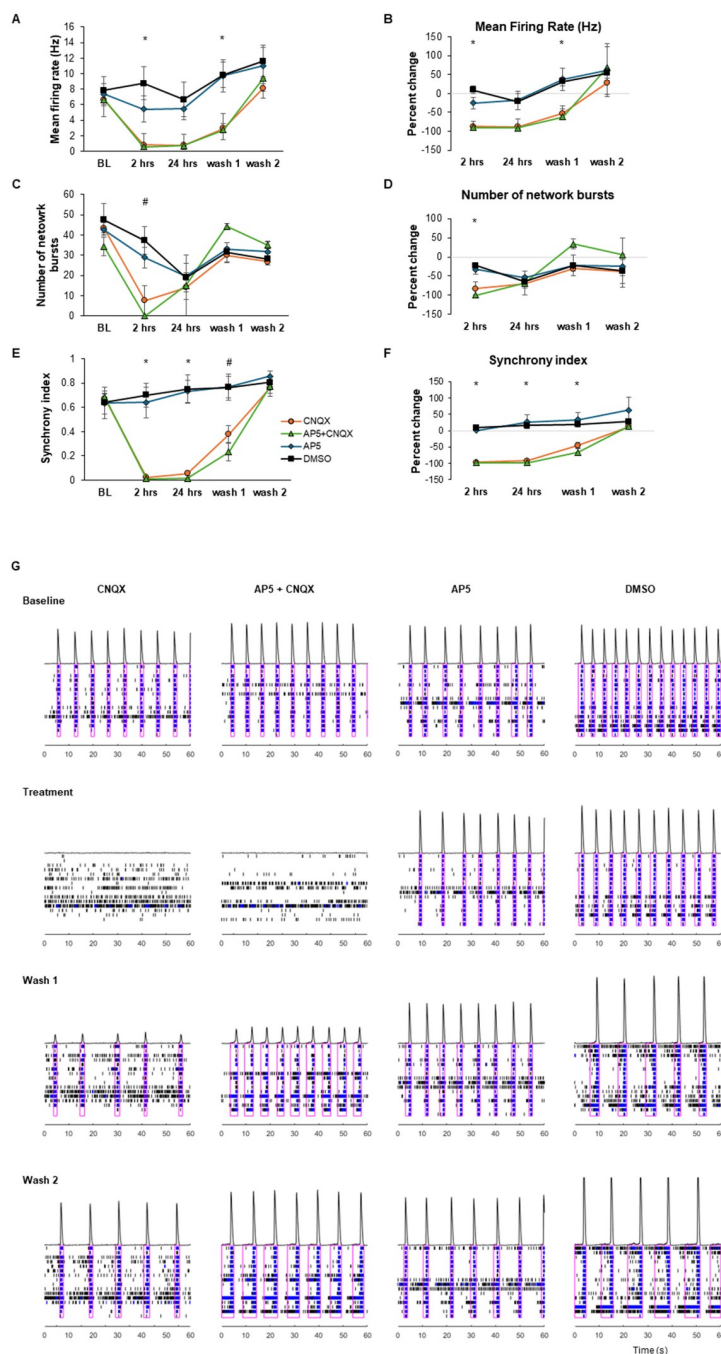

**Fig 3. Glutamate receptor inhibitor treatment.** Wells containing cultures DIV 33 were treated with either 10  $\mu$ M CNQX, 10  $\mu$ M AP5, both 10  $\mu$ M CNQX and 10  $\mu$ M AP5, or 0.1% DMSO ( $n = 4$  per group). Measurements are shown at baseline (BL), 2 hours of treatment, 24 hours of treatment, 4 hours after a 50% media change at 24 hours after BL (wash 1) and 4 hours after a second 50% media change at 48 hours after BL (wash 2). Significant differences were seen in the mean firing rate (A) and percent change of the mean firing rate (B), the number of network bursts per 5-minute recording (C) and respective percent change (D), and the synchrony index (E) and respective percent change (F). Representative raster plots and histograms are shown in G. Repeated measures ANOVAs were significant ( $p < 0.05$ ) for all parameters shown. A-priori post-hoc comparisons between experimental treatments and DMSO were performed, and p-values were Bonferroni corrected (\* $p < 0.05$  and both CNQX and AP5+CNQX differed from DMSO # $p < 0.05$  and AP5+CNQX differed from DMSO). Error bars represent SEM.

<https://doi.org/10.1371/journal.pone.0303901.g003>



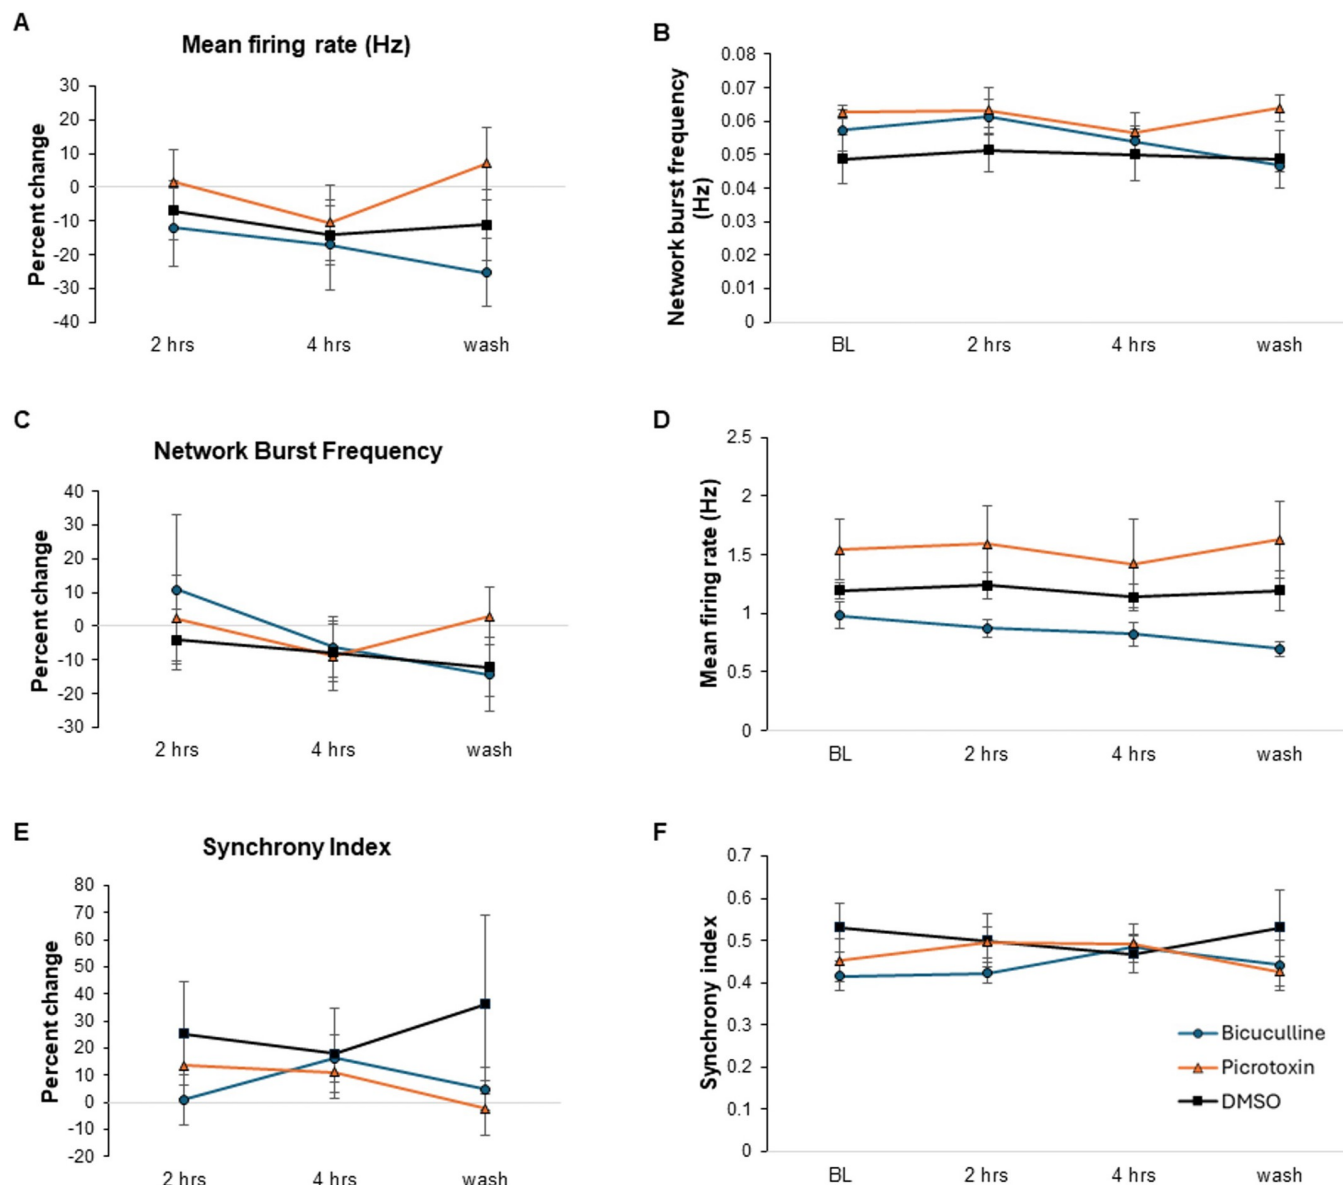

**Fig 4. GABA receptor inhibitor treatment.** Wells containing cultures DIV 35 were treated with either 50  $\mu$ M bicuculline or 50  $\mu$ M picrotoxin ( $n = 5$  per group). There were no significant differences in the parameters of mean firing rate (A), percent change of mean firing rate (B), network burst frequency (C), percent change in network burst frequency (D), synchrony index (E), and percent change in synchrony index (F) at 2 hours and 4 hours after treatment following baseline (BL) or after a 50% media change 24 hours later (wash). Error bars represent SEM.

<https://doi.org/10.1371/journal.pone.0303901.g004>

glutamatergic neurons. However, the Odawara et al study assayed firing immediately after bicuculline treatment, and we cannot rule out changes in our cultures before electrophysiological recording began.

### Modeling blood brain barrier breakdown

To model *in vitro* the blood brain barrier leakage observed in pathological conditions such as Alzheimer's and traumatic brain injury, 10% human serum (Sigma H6914) was added directly to cultures as previously described [14]. As shown in Fig 5, this treatment completely disrupted the activity of the culture as the mean firing rate decreased 5.5-fold

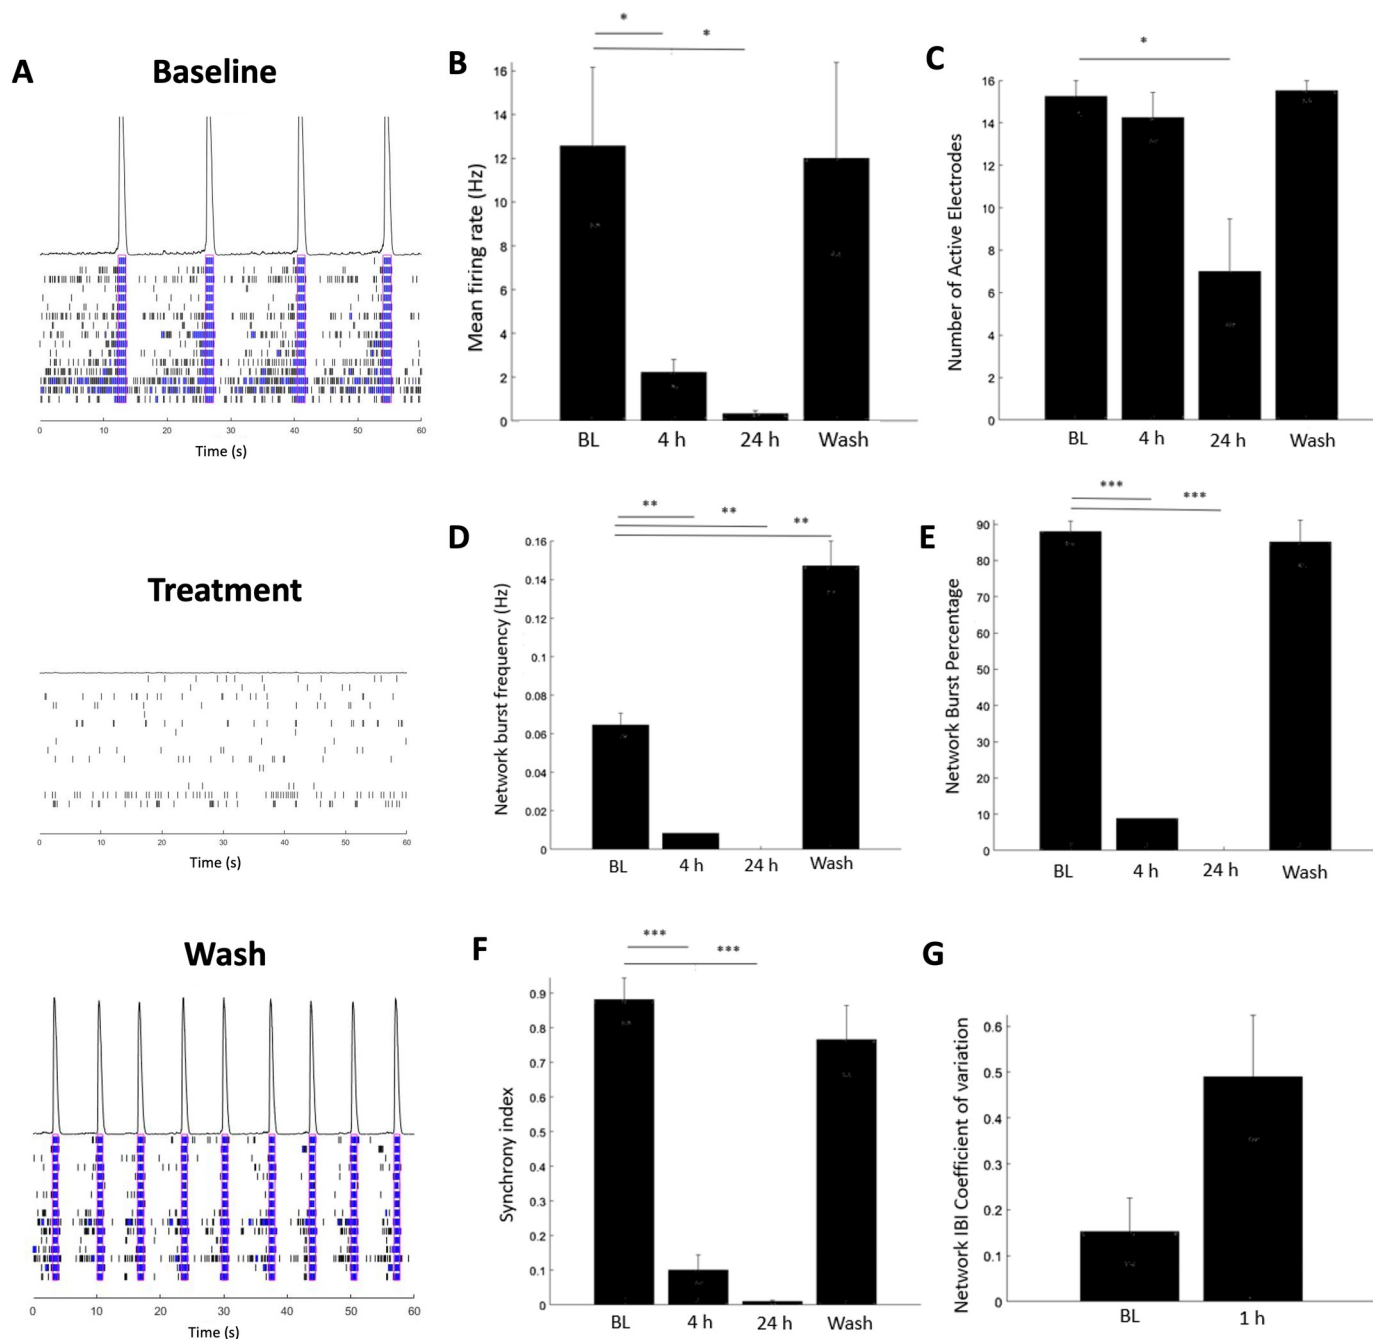

**Fig 5. 10% human serum treatment.** (A) Representative raster plots and histograms of relative population firing rates for baseline, 24 hours after treatment, and after 2 washouts. (B) Mean firing rate (Hz) (C) Number of active electrodes (D) Network burst frequency (Hz) (E) Network burst percentage (%) (F) Synchrony Index (G) Network Interburst Interval Coefficient of Variation. Statistical analysis was performed with repeated measures ANOVA and Bonferroni corrections. Error bar: SEM. N = 4 independent wells. p-value < 0.05 \*, p-value < 0.01 \*\*, p-value < 0.001 \*\*\*.

<https://doi.org/10.1371/journal.pone.0303901.g005>

after 4 hours of exposure. After 24 hours, the culture was nearing zero activity as the mean firing rate dropped to 0.34 Hz. Only 1 of the 4 treated wells had network bursts at the 4-hour timepoint, and after 24 hours there were no network bursting at all. The synchrony index went from a baseline average of 0.88 to 0.01, and, unlike the pharmacological validation treatments, the number of active electrodes was also significantly reduced due to the

serum. In addition, the network disruption was captured as early as the 1-hour timepoint indicated by the IBI coefficient of variation significantly increasing to 0.50. Interestingly, after two washout periods, the cultures were able to recover. This important observation demonstrates that this culture system can distinguish between treatments that specifically affect neuronal function from ones that are generally neurotoxic.

## Discussion

In this study we used neurogenin 2 inducible human pluripotent stem cells differentiated into neurons co-cultured with primary human astrocytes to study electrophysiological parameters associated with the human brain. Differentiated iPSCs were morphologically mature as seen by MAP2 staining, and co-cultures were established at a 2 neuron: 1 astrocyte ratio. Spontaneous activity was observed by multielectrode array analysis. We determined that our fully human 2D cultures were able to achieve strong network burst synchrony similar to iPSC cultures supplemented with rodent astrocytes or to fully human organoids that require months to reach maturation.

We confirmed the functionality of our cultures by treating them pharmacologically. The AMPA-type glutamate receptor inhibitor CNXQ, but not the NMDA-type glutamate receptor inhibitor AP5, completely blocked synchronous bursting in our culture system. However, when cultures were treated with GABA receptor inhibitors bicuculline or picrotoxin there were no statistically significant changes in any parameter measured in this study. It has been previously reported that iPSCs containing the NGN2 transgene differentiate into largely excitatory neurons (90% glutamatergic) [16, 19, 20]. Therefore, any GABAergic neurons present in our culture may not be functional or contributing significantly to the activity of the cultures. Alternatively, due to the lag between treatment and when cultures stabilize after being transferred to the Axion Maestro instrument, we may have missed transient changes in neuronal activity induced by the GABA receptor inhibitors. Future studies using a continuous flow system will help address this issue.

Importantly, we observed electrophysiological reproducibility using our co-culture. These robust results were obtained from three independent differentiations of the NGN2 iPSCs. It has been previously reported that mean firing rate is one of the most variable MEA parameters [21], and our co-culture was consistent not only from well to well but also from plate to plate using the Cytoview MEA plates. Alterations in cell density have been reported to affect parameters like interburst interval [21]. Because of the high-density plating required for this assay, slight variations could be introduced, which could explain why we observed minor variations in some of the parameters comparing plates in S1 Fig.

This NGN2 iPSC/primary astrocyte model can potentially be used to mimic aspects of brain pathology. For example, human serum exposure of brain organoids has been used to model the blood brain barrier leakage reported in AD patients [14]. This study demonstrated that treatment with 10% serum treatment induced A $\beta$ -like pathology, elevated level of phosphorylated tau, synaptic loss, impaired neural network, and neuronal death after 12 days of exposure. In our studies, network activity was lost after serum exposure. However, cells were able to recover after washout periods with an increased network burst frequency compared to baseline. The specific mechanism by which serum exposure drastically alter electrophysiological parameters is still being explored. Our results could be due to the difference between acute and chronic exposure, and more experiments should be done to determine what compound(s) in the serum itself are causing these drastic electrophysiological changes. One possible serum component is  $\beta$ 2-microglobulin. A recent publication found elevated levels of this protein in

human down syndrome plasma. When  $\beta 2$ - microglobulin was administered to wild type mice, they observed synaptic and memory deficits citing NMDA receptor dysfunction [22].

One additional interesting feature of these co-cultures is functional network connectivity that has been referred to as “sleep in a dish”. Synchronous network burst frequency of cell culture models may resemble aspects of slow wave sleep *in vivo* [23, 24]. Specifically, “sleep in a dish” is described as a low frequency burst-pause-burst pattern in the range of 0.06–0.2 Hz [23, 25, 26]. This pattern is the default state of isolated cells that has been well established in dissociated rodent cortical primary cultures and more recently in iPSCs [25, 26]. Our finding replicate these earlier studies and suggest this model may be a useful *in vitro* approach to explore the bidirectional relationship between Alzheimer’s disease and sleep disturbances.

In conclusion, this fully human co-culture exhibits strong, synchronous network bursting on multielectrode arrays in the order of weeks. In a proof-of-concept experiment we were able to demonstrate strong inhibition of synaptic function by serum exposure, a treatment that has been used to simulate breakdown of the blood brain barrier. Using MEA electrophysiology is beneficial as it can sensitively measure neuronal dysfunction, not just assay neuronal death. This technique can also mimic aspects of clinical data without harming human health. Therefore, this method provides a relatively cost effective, fast, high throughput, human method for pharmacological testing of potential treatments for neurodegenerative diseases.

## Supporting information

**S1 Fig. Co-culture electrophysiological reproducibility between two 24-well plates.** Characterized by (A) Mean firing rate (Hz) (B) Number of active electrodes (C) Network burst frequency (Hz) (D) Average network burst duration (s) (E) Network interburst interval coefficient of variation (F) Synchrony index. Statistical analysis was performed with an independent t-test. Error bar: SEM. N = 24 independent wells per plate. p-value < 0.05 \*, p-value < 0.01 \*\*, p-value < 0.001 \*\*\*.  
(TIFF)

**S2 Fig. GABA receptor inhibitor treatment consisting of 10  $\mu$ M bicuculline.** Quantifications of (A) Mean firing rate (Hz) (B) Network burst percentage (C) Network burst frequency (D) Synchrony index for baseline (BL), 4 hours and 24 hours after treatment, and after washout. (E) Representative raster plots and histograms of relative population firing rates for baseline and 24 hours after treatment Statistical analysis was performed with repeated measures ANOVA and Bonferroni corrections. Error bar: SEM. N = 4 independent wells. p-value < 0.05 \*, p-value < 0.01 \*\*, p-value < 0.001 \*\*\*.  
(TIF)

**S1 Dataset.**  
(CSV)

**S2 Dataset.**  
(XLSX)

**S3 Dataset.**  
(XLSX)

**S4 Dataset.**  
(CSV)

**S5 Dataset.**  
(CSV)



## Acknowledgments

This work was performed in the Stem Cell Research and Technology Resource Center at the University of Colorado Boulder. We would like to thank Dr. Roy Parker and his lab for advising us on the hiPSC differentiation protocol.

## Author Contributions

**Conceptualization:** Maddie R. Lemieux, Mark R. Opp, Charles A. Hoeffler.

**Data curation:** Maddie R. Lemieux, Bernhard Freigassner, Jessica L. Hanson, Zahra Thathey.

**Formal analysis:** Maddie R. Lemieux, Jessica L. Hanson.

**Funding acquisition:** Jessica L. Hanson, Mark R. Opp, Charles A. Hoeffler, Christopher D. Link.

**Investigation:** Maddie R. Lemieux, Bernhard Freigassner, Jessica L. Hanson.

**Methodology:** Maddie R. Lemieux, Bernhard Freigassner.

**Project administration:** Maddie R. Lemieux, Mark R. Opp, Charles A. Hoeffler, Christopher D. Link.

**Software:** Maddie R. Lemieux, Bernhard Freigassner.

**Supervision:** Charles A. Hoeffler, Christopher D. Link.

**Validation:** Maddie R. Lemieux, Bernhard Freigassner, Jessica L. Hanson.

**Visualization:** Maddie R. Lemieux, Jessica L. Hanson.

**Writing – original draft:** Maddie R. Lemieux.

**Writing – review & editing:** Maddie R. Lemieux, Bernhard Freigassner, Jessica L. Hanson, Mark R. Opp, Charles A. Hoeffler, Christopher D. Link.

## References

1. Colombi I, Nieuws T, Massimini M, Chiappalone M. Spontaneous and perturbational complexity in cortical cultures. *Brain Sci.* 2021; 11(11), 1453. <https://doi.org/10.3390/brainsci11111453> PMID: 34827452
2. Hyvärinen T, Hyysalo A, Kapucu FE, Aarnos L, Vinogradov A, Eglen SJ, et al. Functional characterization of human pluripotent stem cell-derived cortical networks differentiated on laminin-521 substrate: Comparison to rat cortical cultures. *Sci Rep.* 2019; 9(1). <https://doi.org/10.1038/s41598-019-53647-8> PMID: 31748598
3. Izsak J, Seth H, Andersson M, Vizlin-Hodjic D, Theiss S, Hanse E, et al. Robust generation of person-specific, synchronously active neuronal networks using purely isogenic human ipsc-3d neural aggregate cultures. *Front Neurosci.* 2019; 13. <https://doi.org/10.3389/fnins.2019.00351> PMID: 31068774
4. Sasaki T, Suzuki I, Yokoi R, Sato K, Ikegaya Y. Synchronous spike patterns in differently mixed cultures of human IPSC-derived glutamatergic and GABAergic neurons. *Biochem Biophys Res Commun.* 2019; 513(2), 300–305. <https://doi.org/10.1016/j.bbrc.2019.03.161> PMID: 30954214
5. Caneus J, Akanda N, Rumsey JW, Guo X, Jackson M, Long CJ, et al. A human induced pluripotent stem cell-derived cortical neuron human-on-a chip system to study AB 42 and tau-induced pathophysiological effects on long-term potentiation. *Alzheimers Dement (N Y).* 2020; 6(1). <https://doi.org/10.1002/trc2.12029> PMID: 32490141
6. Autar K, Guo X, Rumsey JW, Long CJ, Akanda N, Jackson M, et al. A functional hipsc- cortical neuron differentiation and maturation model and its application to neurological disorders. *Stem Cell Rep.* 2022; 17(1), 96–109. <https://doi.org/10.1016/j.stemcr.2021.11.009> PMID: 34942087
7. Fardet T, Ballandras M, Bottani S, Métenes S, Monceau P. Understanding the generation of network bursts by adaptive oscillatory neurons. *Front Neurosci.* 2018; 12. <https://doi.org/10.3389/fnins.2018.00041> PMID: 29467607

8. Kayama T, Suzuki I, Odawara A, Sasaki T, Ikegaya Y. Temporally coordinated spiking activity of human induced pluripotent stem cell-derived neurons co-cultured with astrocytes. *Biochem Biophys Res Commun*. 2018; 495(1), 1028–1033. <https://doi.org/10.1016/j.bbrc.2017.11.115> PMID: 29170135
9. Odawara A., Katoh H., Matsuda N., & Suzuki I. (2016). Physiological maturation and drug responses of human induced pluripotent stem cell-derived cortical neuronal networks in long-term culture. *Sci Rep*, 6(1). <https://doi.org/10.1038/srep26181> PMID: 27188845
10. Trujillo CA, Gao R, Negraes PD, Gu J, Buchanan J, Preissl S, et al. Complex oscillatory waves emerging from cortical organoids model early human brain network development. *Cell Stem Cell*. 2019; 25(4). <https://doi.org/10.1016/j.stem.2019.08.002> PMID: 31474560
11. Shih PY, Kreir M, Kumar D, Seibt F, Pestana F, Schmid B, et al. Development of a fully human assay combining NGN2-inducible neurons co-cultured with iPSC-derived astrocytes amenable for electrophysiological studies. *Stem Cell Res*. 2021; 54, 102386. <https://doi.org/10.1016/j.scr.2021.102386> PMID: 34229210
12. Odawara A, Saitoh Y, Alhebshi AH, Gotoh M, Suzuki I. Long-term electrophysiological activity and pharmacological response of a human induced pluripotent stem cell-derived neuron and astrocyte co-culture. *Biochem Biophys Res Commun*. 2014; 443(4), 1176–1181. <https://doi.org/10.1016/j.bbrc.2013.12.142> PMID: 24406164
13. Humpel C, Foidl BM. Can mouse models mimic sporadic alzheimer's disease? *Neural Regen Res*. 2020; 15(3), 401. <https://doi.org/10.4103/1673-5374.266046> PMID: 31571648
14. Chen X, Sun G, Tian E, Zhang M, Davtyan H, Beach TG, et al. Modeling sporadic alzheimer's disease in human brain organoids under serum exposure. *Adv Sci*. 2021; 8(18), 2101462. <https://doi.org/10.1002/advs.202101462> PMID: 34337898
15. Allen Institute for Cell Science. [cited 2023 Nov 8] Available from: <https://www.allencell.org/genomics.html>
16. Fernandopulle MS, Prestil R, Grunseich C, Wang C, Gan L, Ward ME. (2018). Transcription Factor-Mediated Differentiation of Human iPSCs into Neurons. *Curr Protoc Cell Biol*. 2018; 79(1):e51. <https://doi.org/10.1002/cpcb.51> PMID: 29924488
17. Prabhu AV, Kang I, De Pace R, Wassif CA, Fujiwara H, Kell P, et al. A human iPSC-derived inducible neuronal model of Niemann-Pick disease, type C1. *BMC Biol*. 2021 Oct 1; 19(1):218. <https://doi.org/10.1186/s12915-021-01133-x> PMID: 34592985
18. Tian R, Gachechiladze MA, Ludwig CH, Laurie MT, Hong JY, Nathaniel D, et al. CRISPR interference-based platform for multimodal genetic screens in human iPSC-derived neurons. *Neuron*. 2019 Oct 23; 104(2):239–255.e12. <https://doi.org/10.1016/j.neuron.2019.07.014> PMID: 31422865
19. Busskamp V, Lewis NE, Guye P, Ng AH, Shipman SL, Byrne S, et al. Rapid neurogenesis through transcriptional activation in human stem cells. *Mol Syst Biol*. 2014; 10(11). <https://doi.org/10.15252/msb.20145508> PMID: 25403753
20. Zhang Y, Pak C, Han Y, Ahlenius H, Zhang Z, Chanda S, et al. (2013). Rapid single-step induction of functional neurons from human pluripotent stem cells. *Neuron*. 2013; 78(5), 785–798. <https://doi.org/10.1016/j.neuron.2013.05.029> PMID: 23764284
21. Mossink B, Verboven AHA, van Hugte EJH, Klein Gunnewiek TM, Parodi G, Linda K, et al. Human neuronal networks on micro-electrode arrays are a highly robust tool to study disease-specific genotype-phenotype correlations in vitro. *Stem Cell Rep*. 2021 Sep 14; 16(9):2182–2196. <https://doi.org/10.1016/j.stemcr.2021.07.001> PMID: 34329594
22. Gao Y, Hong Y, Huang L, Zheng S, Zhang H, Wang S, et al. B2-microglobulin functions as an endogenous NMDAR antagonist to impair synaptic function. *Cell*. 2023; 186(5). <https://doi.org/10.1016/j.cell.2023.01.021> PMID: 36868208
23. Hinard V, Mikhail C, Pradervand S, Curie T, Houtkooper RH, Auwerx J, et al. Key electrophysiological, molecular, and metabolic signatures of sleep and wakefulness revealed in primary cortical cultures. *J Neurosci*. 2012 Sep 5; 32(36):12506–17. <https://doi.org/10.1523/JNEUROSCI.2306-12.2012> PMID: 22956841
24. Dykstra-Aiello C, Koh KM, Nguyen J, Xue M, Roy S, Krueger JM. A wake-like state *in vitro* induced by transmembrane TNF/soluble TNF receptor reverse signaling. *Brain Behav Immun*. 2021 94, 245–258. <https://doi.org/10.1016/j.bbi.2021.01.036> PMID: 33571627
25. Yokoi R, Okabe M, Matsuda N, Odawara A, Karashima A, Suzuki I. Impact of sleep-wake-associated neuromodulators and repetitive low-frequency stimulation on human ipsc-derived neurons. *Front Neurosci*. 2019; 13. <https://doi.org/10.3389/fnins.2019.00554> PMID: 31191238
26. Bandarabadi M, Vassalli A, Tafti M. Sleep as a default state of cortical and subcortical networks. *Curr Opin Physiol*. 2020; 15, 60–67. <https://doi.org/10.1016/j.cophys.2019.12.004>
